# Supplementary material for: Virtual screening and biological evaluation of novel small molecular inhibitors against protein arginine methyltransferase 1 (PRMT1)
Source: Royal Society of Chemistry journal article supplement (doi:10.1039/c4ob01591f), 2014-10-28
Supplement: c4ob01591f1.pdf [file c4ob01591f1.pdf]

PRMT6 (human). (B) Structural superimposition of active sites of PRMT1, PRMT4 and PRMT6. PRMT1 (PDB ID code: IOR8), PRMT4 (3B3F) and PRMT6 (4HC4) are colored grey, mazarine and pink, respectively. DCLX069 and DCLX078 shown in sticks are colored orange and cyan.

## **Experimental**

### **Histone Hypomethylation**

HepG2 cells were treated with DCLX078, the cells are incubated at 37 °C. Appropriate DMSO controls are included. After 72 hours, the supernatant is removed. The cells are resuspended in 500 µl ice-cold PBS and collected in 1.5 ml reaction tubes. The cells were lysed, and boiled at 99 °C for 5 min in sample buffer (50 mM TrisHCl PH 8.0; 150 mM NaCl; 1% NP-40; 0.5% sodium deoxycholate; 0.1% SDS). Lysate were separated with SDS-PAGE, and transferred to PVDF membrane (GE healthcare). The membranes were first incubated with blocking buffer (TBS with 0.05% Tween 20, 5% non-fat milk) for 2 h at room temperature and then incubated overnight at 4 °C in buffer containing primary antibodies respectively. (anti-dimethyl-Histone H4 (Arg3) Asymmetric, Millipore & anti-Histone H4, PTM Biolabs, Inc.). The membranes were washed thrice and incubated with goat anti-rabbit IgG HRP for 2 h. After washing, immunostaining was visualized using FluorChemFC3(Proteinsimple<sup>TM</sup>).
